# Supplementary material for: A skin-friendly soft strain sensor with direct skin adhesion enabled by using a non-toxic surfactant
Source: Royal Society of Chemistry journal article supplement (doi:10.1039/d3tc01150j), 2023-01-01
Supplement: d3tc01150j1.pdf [file d3tc01150j1.pdf]

## Supplementary Information

### **Skin-friendly soft strain sensor with direct skin adhesion enabled by non-toxic surfactant**

Haechan Park,<sup>‡a</sup> Myeonghyeon Na,<sup>‡a</sup> Donghyung Shin,<sup>‡a</sup> Daeun Kim,<sup>a</sup> Euna Kim,<sup>b</sup> Sehyun  
Kim,<sup>a</sup> Donghyun Lee,<sup>b</sup> Kyoseung Sim<sup>\*a,c</sup>

<sup>a</sup>Department of Chemistry, Ulsan National Institute of Science and Technology (UNIST),  
Ulsan, 44919, Republic of Korea.

<sup>b</sup>School of Energy and Chemical Engineering, Ulsan National Institute of Science and  
Technology (UNIST), Ulsan, 44919, Republic of Korea.

<sup>c</sup>Center for Wave Energy Materials, Ulsan National Institute of Science and Technology  
(UNIST), Ulsan, 44919, Republic of Korea.

<sup>‡</sup>These authors contributed equally to this work.

\*Correspondence to: [kyos@unist.ac.kr](mailto:kyos@unist.ac.kr)

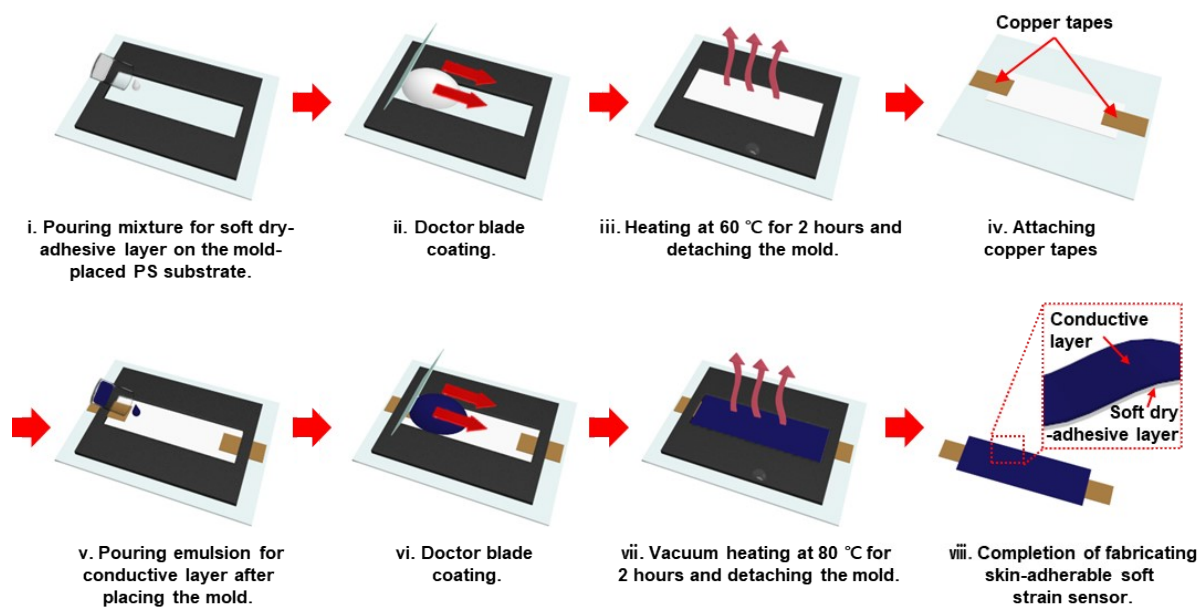

**Fig. S1** A schematic fabrication process of the skin-adherable soft strain sensor.

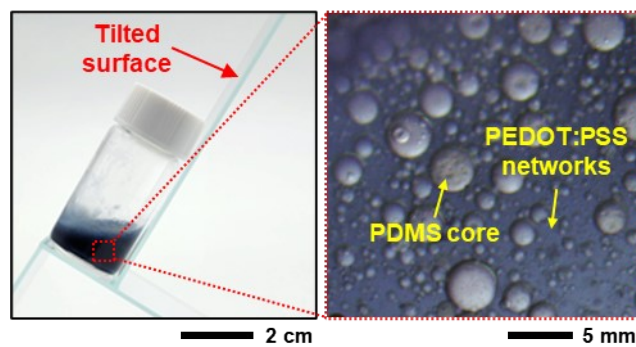

**Fig. S2** Optical (left) and optical microscopic (right) images of the emulsions state of soft conductive composite blended with pristine PEDOT:PSS solution.

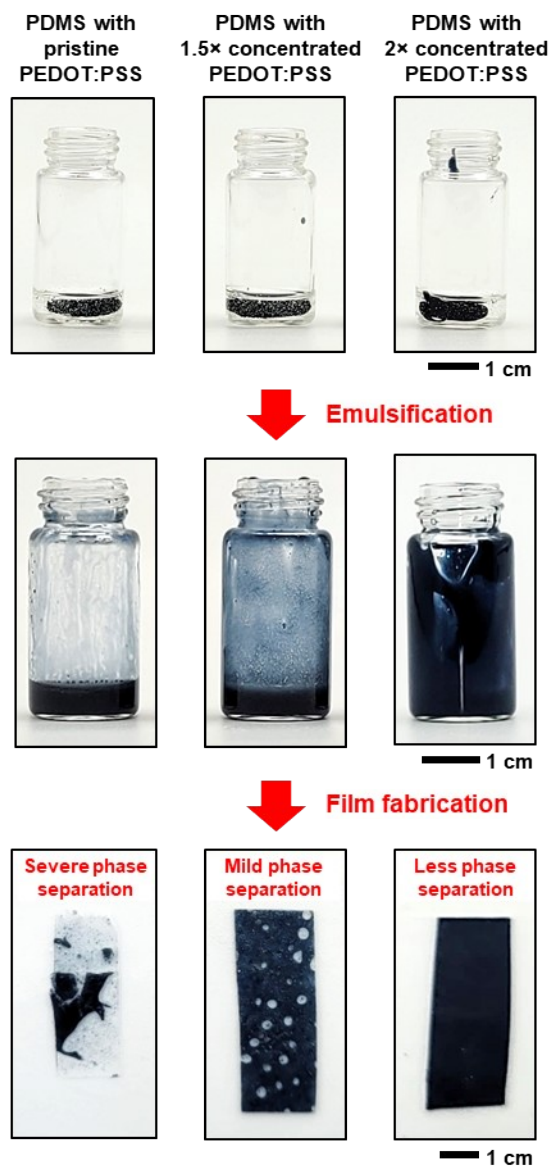

**Fig. S3** Optimization process of concentrating PEDOT:PSS solution for the soft conductive composite.

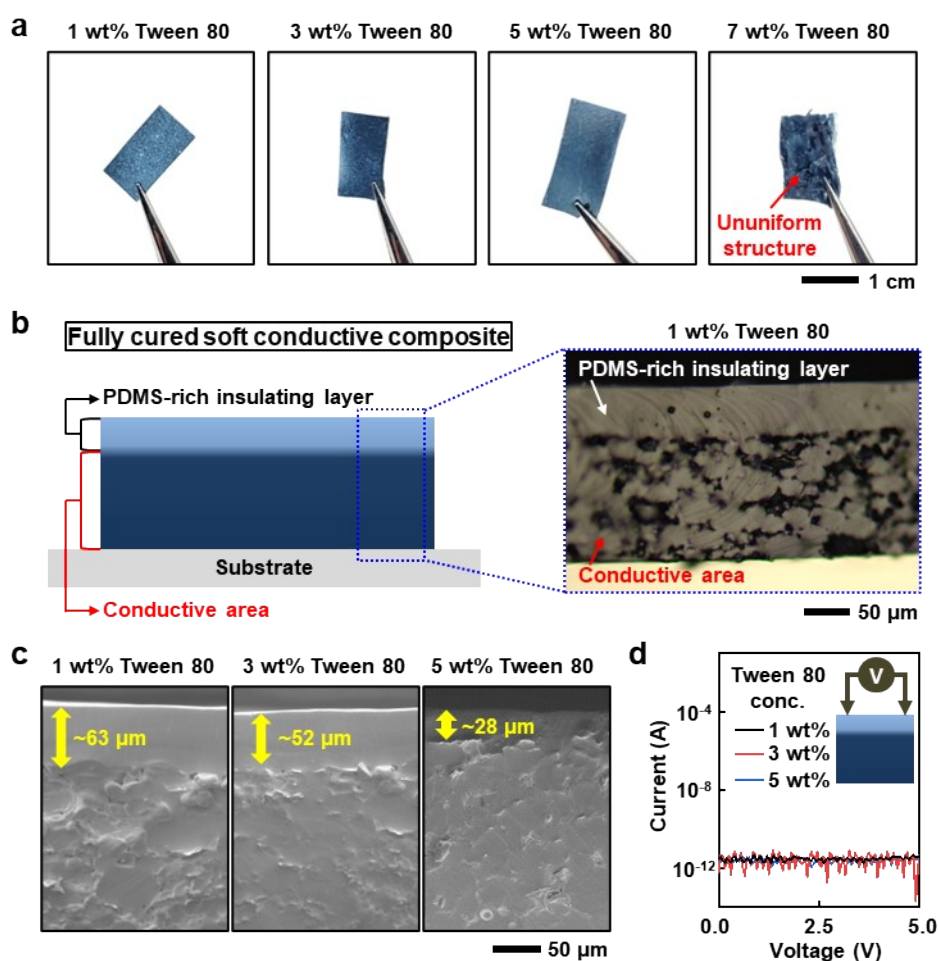

**Fig. S4** Optimization process of Tween 80 concentration for the soft conductive composites. (a) Optical images of the soft conductive composite with varying Tween 80 concentrations. (b) Schematic illustration of the phase-separated soft conductive composites (left) and cross-sectional optical microscopic image (right) of the 1 wt% Tween 80-added soft conductive composites. (c) Cross-sectional SEM images of the soft conductive composites as a function of Tween 80 concentrations. (d) Current-voltage curves of the PDMS-rich insulating layers in the soft conductive composites, depending on the Tween 80 concentrations, with an inset showing a schematic illustration of the measurement setup.

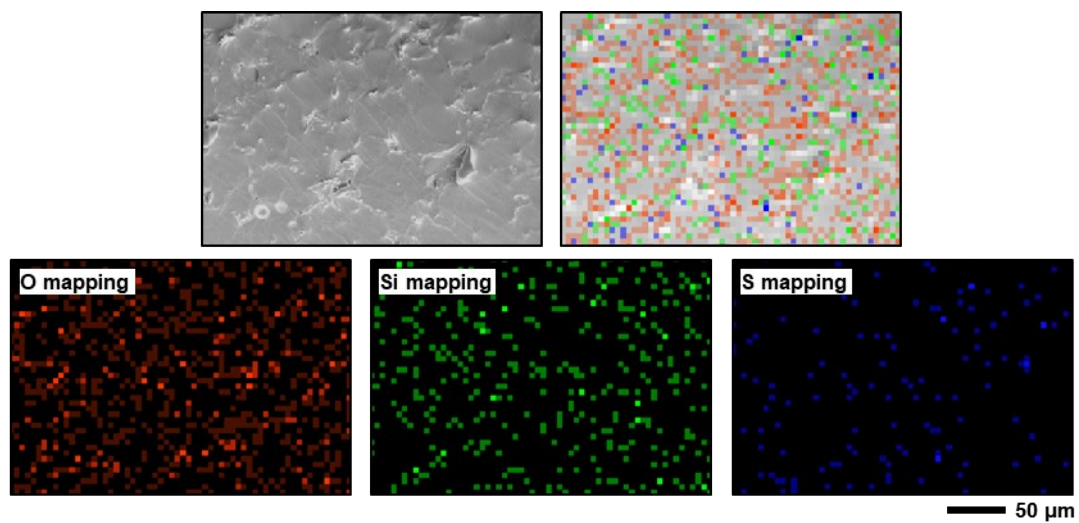

**Fig. S5** Cross-sectional EDS elements mapping of the 5 wt% Tween 80-added soft conductive composite.

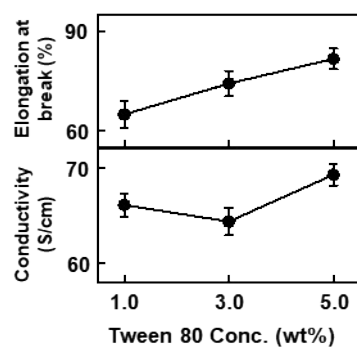

**Fig. S6** Electrical conductivities (bottom) and elongation at break (top) of the soft conductive composites depending on the Tween 80 concentrations ( $n = 5$ ).

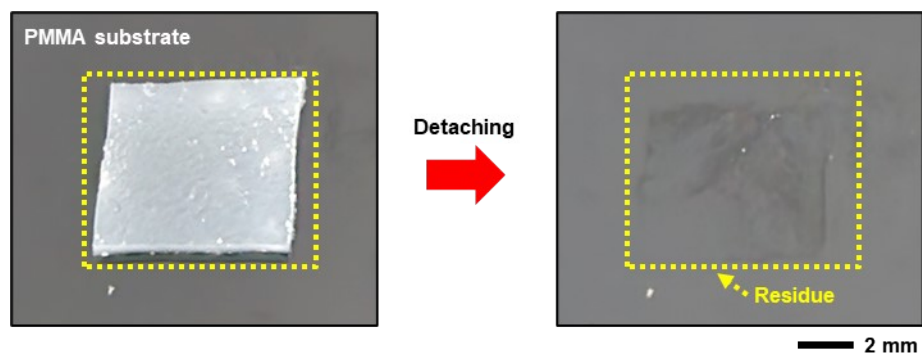

**Fig. S7** Residue test of the 3.0 wt% Tween 80-added soft dry-adhesive film.



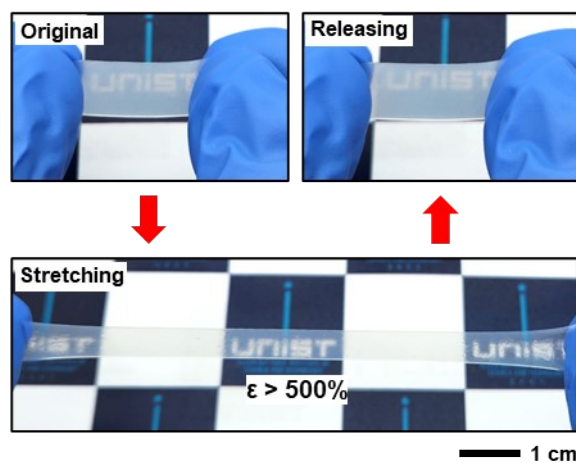

**Fig. S8** Optical images of the 2.5 wt% Tween 80-added soft dry-adhesive film under mechanical strain.

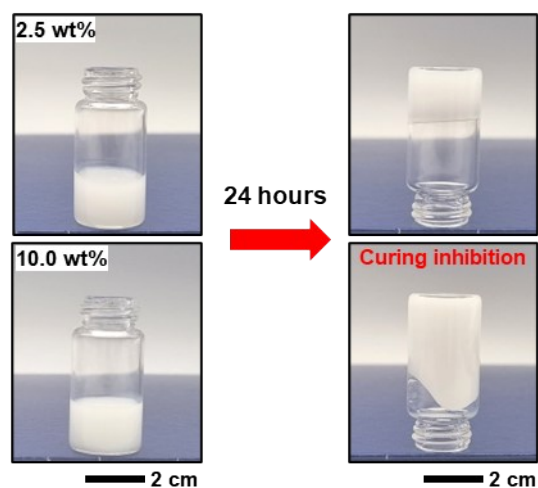

**Fig. S9** Optical images of the 2.5 wt% (top), and 10.0 wt% (bottom) Tween 80-added soft dry-adhesive films curing at room temperature for 24 hours.

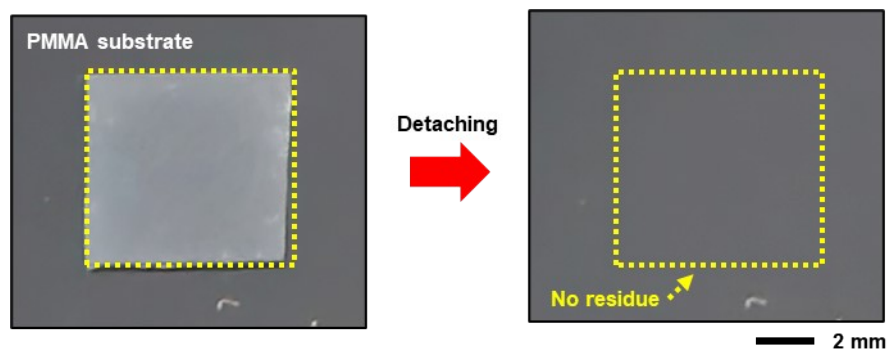

**Fig. S10** Residue test of the 2.5 wt% Tween 80-added soft dry-adhesive film.

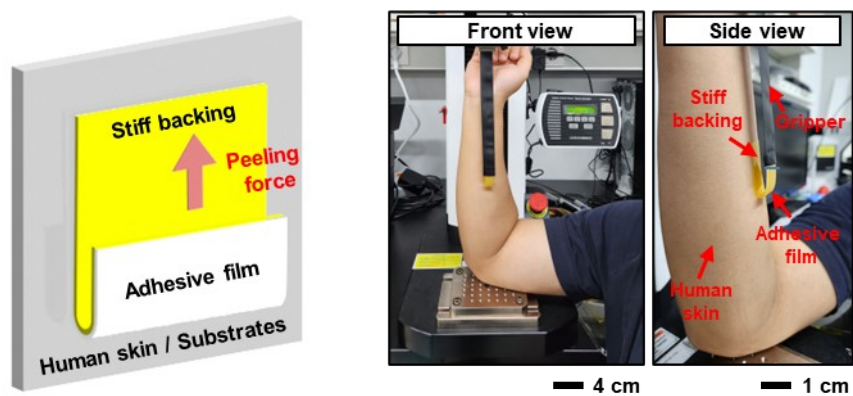

**Fig. S11** Schematic (left) and optical (right) images of the adhesion test.

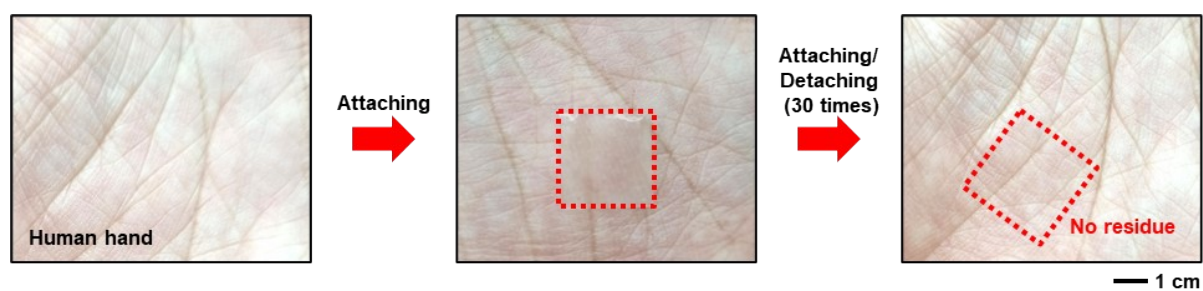

**Fig. S12** Residue test of the 2.5 wt% Tween 80-added soft dry-adhesive film on human hand.

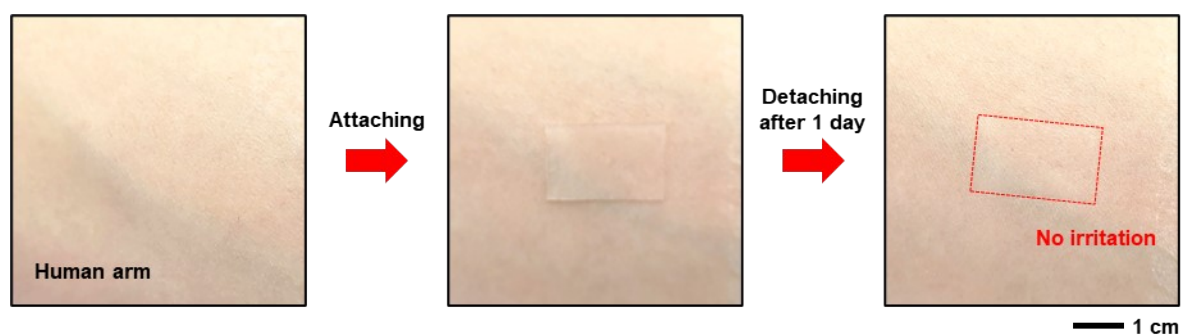

**Fig. S13** Skin irritation test of the 2.5 wt% Tween 80-added soft dry-adhesive film on the human arm.

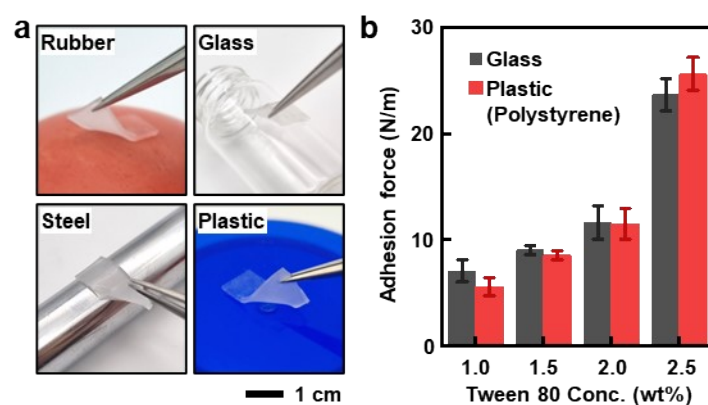

**Fig. S14** Adhesion properties of the soft dry-adhesive film on the various objects. (a) Optical images of the 2.5 wt% Tween 80-added soft dry-adhesive film on the various subjects. (b) Adhesion forces of the soft dry-adhesive films with different Tween 80 concentrations on the various subjects ( $n = 5$ ).

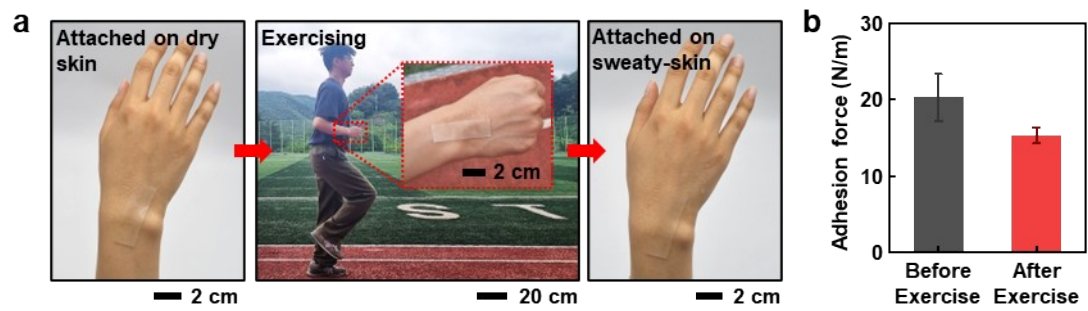

**Fig. S15** Sweating effect on the adhesion force of the soft dry-adhesive film. (a) Optical images and (b) adhesion force of the soft dry-adhesive films before, and after exercising ( $n = 5$ ).



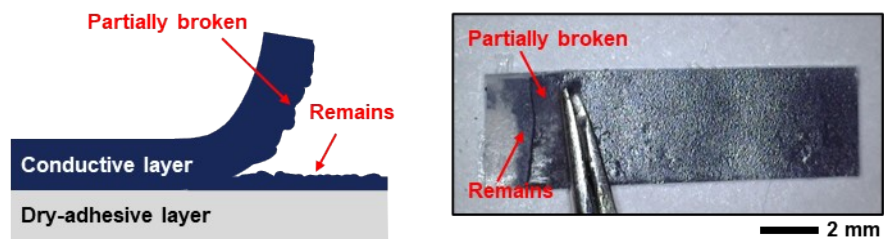

**Fig. S16** Schematic (left), and optical (right) images of significant adhesion between conductive, and dry-adhesive layers.

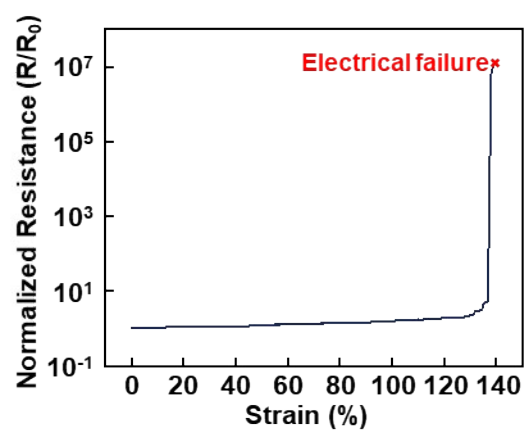

**Fig. S17** Electrical failure of the skin-adherable soft strain sensor under the mechanical strain.
